# Supplementary material for: Generation and interception of bicyclo[3.2.1]oct-2-yne: an experimental and theoretical mechanistic study
Source: Royal Society of Chemistry journal article supplement (doi:10.1039/d4cc03048f), 2024-01-01
Supplement: d4cc03048f1.pdf [file d4cc03048f1.pdf]

## Supporting Information

### Generation and Interception of Bicyclo[3.2.1]oct-2-yne: An Experimental and Theoretical Mechanistic Study

T. E. Anderson,<sup>a</sup> Beauty K. Chabuka,<sup>b</sup> Igor V. Alabugin,<sup>\*b</sup> Dasan M. Thamattoor,<sup>\*a</sup> and David Lee Phillips<sup>\*c</sup>

<sup>a</sup> Department of Chemistry, Colby College, Waterville, ME 04901 United States

<sup>b</sup> Department of Chemistry and Biochemistry, Florida State University, Tallahassee, FL 32306 United States

<sup>c</sup> Department of Chemistry, The University of Hong Kong, The University of Hong Kong, Pok Fu Lam 999077, Hong Kong, S.A.R., P. R. China

<sup>\*a</sup>E-mail: [dmthamat@colby.edu](mailto:dmthamat@colby.edu)

<sup>\*b</sup>E-mail: [alabugin@chem.fsu.edu](mailto:alabugin@chem.fsu.edu)

<sup>\*c</sup>E-mail: [phillips8hk@gmail.com](mailto:phillips8hk@gmail.com)

#### Table of Contents

|                               |    |
|-------------------------------|----|
| General Notes.....            | 2  |
| Computational Procedures..... | 2  |
| Supplementary Figures.....    | 3  |
| Synthetic Procedures.....     | 5  |
| Computational Data.....       | 8  |
| Experimental Spectra.....     | 17 |
| References.....               | 23 |

## General Notes.

Tetrahydrofuran was degassed by purging with nitrogen, and dried by passage through two activated alumina columns (2 ft × 4 in). Other solvents and reagents were used as obtained from commercial sources. Medium pressure flash chromatography was performed on an automated system using prepacked silica gel columns (70–230 mesh), or by hand using Sorbtech silica gel 60A (35 x 70 mesh) with the indicated eluents. AgNO<sub>3</sub>-treated silica gel was prepared as follows: To a solution of AgNO<sub>3</sub> (12.0 g) in acetonitrile (100 mL) was added silica gel (40 g). The mixture was stirred, and the resulting slurry was heated at 80 °C *in vacuo* on a rotary evaporator for 2 h, then allowed to cool to room temperature and stored in a foil-covered flask. Proton (<sup>1</sup>H) and proton-decoupled carbon <sup>13</sup>C{<sup>1</sup>H} NMR spectra were recorded in CDCl<sub>3</sub> at 500 and 126 MHz, respectively. The data are reported as follows: chemical shift in ppm referenced to residual solvent (<sup>1</sup>H NMR: CDCl<sub>3</sub> δ 7.26; <sup>13</sup>C NMR: CDCl<sub>3</sub> δ 77.2, multiplicity, coupling constants (Hz), and integration. Structures were determined using COSY, HSQC, and HMBC experiments. Overlapping carbon peaks were identified using HSQC experiments and integration of <sup>13</sup>C NMR spectra. High resolution mass spectra (HRMS) data were obtained on an Agilent 6230 TOF Mass Spectrometer. Infrared spectra (resolution 4.0 cm<sup>-1</sup>) were acquired on solid samples with an FTIR instrument equipped with an attenuated total reflectance (ATR) accessory. Photolysis experiments were conducted with a Newport 200 W Xe-Hg arc lamp (model # 6290; horizontal intensity 600 cd) with a Newport 280–400 dichroic mirror (model # 66245) fitted in a Newport 67005 Housing with a Newport 69907 Universal Arc Lamp Power Supply. All photolysis reactions were conducted in quartz glassware positioned 30 cm away from the light source. All reactions were performed under an atmosphere of argon in glassware that had been dried in an oven at 120 °C unless otherwise stated.

## Computational Procedures.

All quantum chemical calculations, except NBO, were performed using Orca (version 5.0).<sup>1-3</sup> Geometries were optimized using hybrid density functional theory (M06-2X)<sup>4</sup> using Ahrlich's def2-TZVP basis set.<sup>5</sup> Frequency calculations were performed to verify the nature of the stationary points as minima (0 imaginary frequency) or maxima (1 imaginary frequency). Single point energy calculations were performed using domain-based local pair natural orbital coupled-cluster [DLPNO-CCSD(T)]<sup>6-15</sup> methods in combination with Ahrlich's def2-TZVPP basis set.<sup>5</sup> The auxiliary basis sets def2/J<sup>16</sup> and def2-TZVPP/C<sup>17-18</sup> were also used for density functional theory and coupled-cluster methods, respectively. All density functional theory calculations used Grimme's atom-pairwise dispersion correction with Becke–Johnson damping (D3BJ).<sup>19-21</sup> Acceleration of SCF and exchange integral calculations was accomplished by invoking the resolution-of-identity<sup>22</sup> option and the chain-of-spheres<sup>23-25</sup> algorithm, respectively (RIJCOSX). Solvent effects were incorporated using the conductor-like polarizable continuum model (CPCM).<sup>26</sup> T1 diagnostic values<sup>27</sup> for coupled-cluster calculations were <0.02, indicating that the systems are adequately described by a single reference wave function. Transition state geometries were calculated using nudged elastic band with transition state optimization (NEB-TS)<sup>28-30</sup>.

GaussView (version 6.0)<sup>31</sup> and/or ChemCraft<sup>32</sup> were used to visualize computational data. Gibbs free energies were determined from the computational data by adding the electronic energy  $E_{el}$ , calculated at the DLPNO-CCSD(T) level, to the Gibbs free energy minus the electronic energy ( $G-E_{el}$ ), calculated at the M06-2X level.<sup>33</sup> NBO calculations<sup>34</sup> were performed with Gaussian 16<sup>35</sup> at M06-2X/D3/6-311++G(d,p) level of theory in gas phase.

### Supplementary Figures.

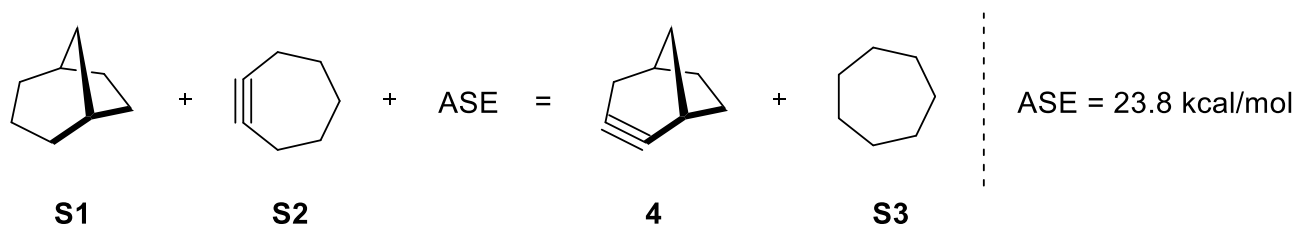

**Figure S1.** Alkynyl strain energies (ASE) in bicyclo[3.2.1]oct-2-yne (**4**) relative to monocyclic cycloheptyne (**S2**). Based on isodesmic equations similar to those described by Bach,<sup>36</sup> calculated at the DLPNO-CCSD(T)/def2-TZVPP//M06-2X/def2-TZVP level of theory.

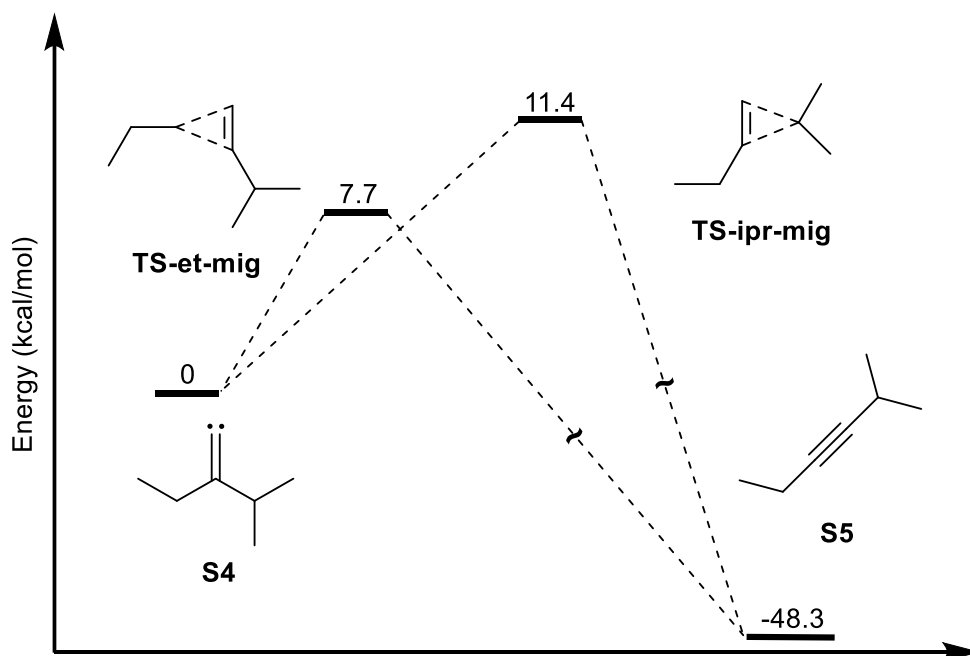

**Figure S2.** Potential energy surface for the FBW rearrangement of ethyl isopropyl alkylidene carbene (**S4**) to 2-methylhex-3-yne (**S5**), involving migration of the ethyl group (via **TS-et-mig**) or the isopropyl group (via **TS-ipr-mig**), computed at CCSD(T)/def2-TZVPP//M06-2X/def2-TZVP

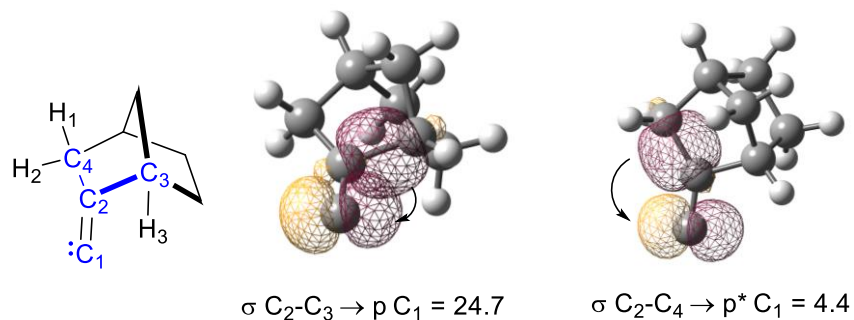

**Figure S3.** NBO analysis showing hyperconjugative interactions of vacant p orbital on C<sub>1</sub> with the C<sub>2</sub>-C<sub>3</sub> and C<sub>2</sub>-C<sub>4</sub> bonds in the carbene. [Beauty/Igor: Please add a structure for the C<sub>2</sub>-C<sub>4</sub> bond with the p orbital.]

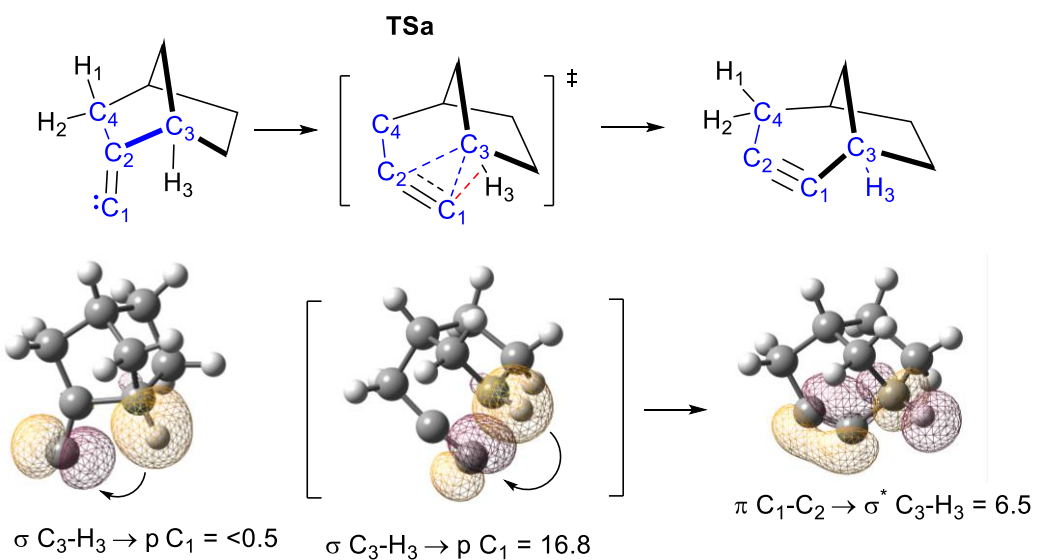

**In alkyne, interaction of in-plane  $\pi$ -bond and the bridgehead C-H bond**

**Figure S4.** NBO analysis showing the weak interaction between C<sub>3</sub>-H<sub>3</sub> bond and the vacant p orbital on C<sub>1</sub> in the carbene which then gains substantial importance in TSa and remains significant in the product alkyne.

## Synthetic Procedures.

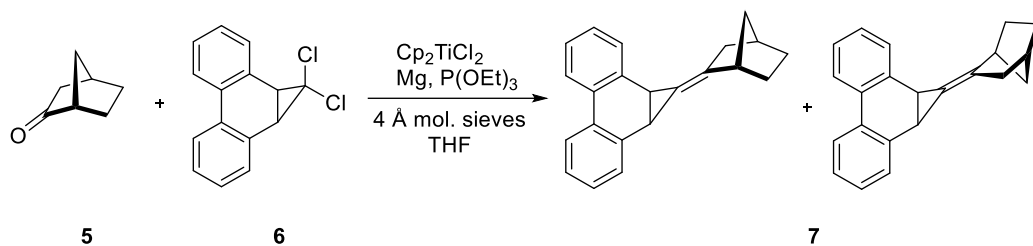

**Precursor 7:** Following the procedure of Takeda *et al.*,<sup>37</sup> to a round-bottom flask charged with magnesium turnings (0.365 g, 15.0 mmol) and 4 Å molecular sieves (0.750 g) was added bis(cyclopentadienyl)titanium(IV) dichloride (3.73 g, 15.0 mmol) followed by anhydrous THF (30 mL). Triethyl phosphite (5.14 mL, 30.0 mmol) was added and the reaction mixture was stirred for 3 h, during which the color of the mixture turned from red to dark green. A solution of dichlorocyclopropyl phenanthrene **6** (1.31 g, 5.00 mmol) dissolved in THF (10 mL) was added and the reaction mixture was stirred for an additional 30 min. Norcamphor (**5**, 0.275 g, 2.50 mmol) in THF (5 mL) was then added, and the reaction mixture was stirred for an additional 16 h. Hexanes (100 mL) was added, and the resulting suspension was transferred to a plug of silica and eluted with hexanes (100 mL) followed by a solution of hexanes and ethyl acetate (10:90, 40 mL). The elution was concentrated *in vacuo* to yield precursor **7** as a mixture of diastereomers in a 1.0:1.0 ratio. Purification of the resulting residue by flash chromatography with silica gel (hexanes) followed by flash column chromatography with  $\text{AgNO}_3$ -treated silica gel (30%  $\text{AgNO}_3$ , 2:98→20:80 ethyl acetate:hexanes) afforded precursor **7** as a mixture of diastereomers in 1.0:0.45 ratio as a white solid (0.190 g, 33%): mp = 96–104 °C.  $^1\text{H}$  NMR (500 MHz,  $\text{CDCl}_3$ )  $\delta$  7.98–7.90 (m, 2.9H), 7.44–7.31 (m, 2.9H), 7.26–7.19 (m, 5.8H), 3.16–3.08 (m, 2.45H), 3.07–3.02 (m, 0.45H), 2.78 (d,  $J = 3.1$  Hz, 1H), 2.68 (d,  $J = 2.9$  Hz, 0.45H), 2.30–2.23 (m, 1.45H), 2.21–2.14 (m, 1H), 1.99–1.86 (m, 0.9H), 1.69–1.56 (m, 1.9H), 1.44–1.21 (m, 4.9H), 1.15–1.10 (m, 0.45H), 1.07–1.02 (m, 0.45H), 0.87–0.79 (m, 1H), 0.47–0.38 (m, 1H).  $^{13}\text{C}$  NMR (126 MHz,  $\text{CDCl}_3$ )  $\delta$  135.6 (major), 135.4 (minor), 134.8 (major), 134.7 (minor), 134.3 (major), 134.0 (minor), 129.4 (major), 129.34 (minor), 129.31 (minor), 129.26 (major), 128.94 (minor), 128.86 (major), 128.85 (minor), 128.6 (major), 127.8 (major), 127.7 (minor), 127.61 (minor), 127.57 (major), 125.83 (minor), 125.77 (2C, major, minor), 125.7 (major), 123.41 (major), 123.35 (minor), 123.33 (minor), 123.2 (major), 113.3 (major), 112.3 (minor), 43.8 (major), 43.1 (minor), 39.4 (major), 39.3 (minor), 37.0 (major), 36.8 (minor), 36.5 (2C, major, minor), 29.4 (minor), 28.8 (major), 28.6 (minor), 28.0 (major), 22.5 (major), 22.2 (major), 22.12 (minor), 22.05 (minor). IR (ATR) 3060, 3025, 2956, 2864, 1599, 1485, 1438  $\text{cm}^{-1}$ . HRMS (ESI)  $m/z$ :  $[\text{M} + \text{H}]^+$  Calcd for  $\text{C}_{22}\text{H}_{20}$  285.1638; Found 285.1659.

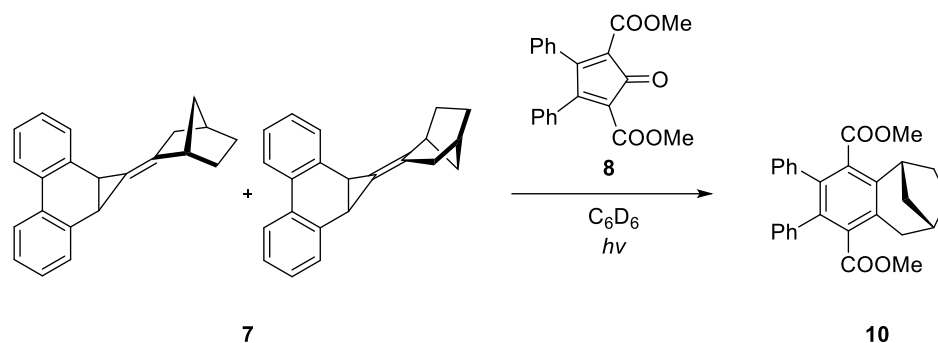

**Photolysis of 7:** Precursor **7** (0.110 g, 0.385 mmol) and 2-oxo-4,5-diphenyl-cyclopenta-3,5-diene-1,3-dicarboxylic acid dimethylester (**8**, 0.134 g, 0.385 mmol) were dissolved in deuterated benzene (5 mL) and transferred to an argon-flushed quartz cuvette. The reaction mixture was placed in front of a mercury lamp and irradiated until the starting material was consumed, as determined by  $^1\text{H}$  NMR analysis of the reaction mixture (22 h). The benzene was then removed *in vacuo*, and purification of the resulting residue by flash chromatography (2:98  $\rightarrow$  10:90 ethyl acetate:hexanes) afforded adduct **10** as a white solid (0.062 g, 38%): mp = 159–162 °C.  $^1\text{H}$  NMR (500 MHz,  $\text{CDCl}_3$ )  $\delta$  7.18–6.99 (m, 8H), 6.97–6.87 (m, 2H), 3.51–3.41 (m, 6H), 3.20–3.06 (m, 2H), 2.65–2.54 (m, 2H), 2.06–1.90 (m, 3H), 1.87–1.80 (m, 1H), 1.80–1.73 (m, 1H), 1.65–1.51 (m, 1H).  $^{13}\text{C}$  NMR (126 MHz,  $\text{CDCl}_3$ )  $\delta$  169.7 (C), 169.6 (C), 141.3 (C), 138.43 (C), 138.39 (C), 136.6 (C), 136.34 (C), 136.30 (C), 134.0 (C), 131.2 (C), 130.4 (CH), 130.2 (CH), 129.9 (CH), 127.5 (2C), 126.9, 51.9 (2C), 38.8, 37.4, 35.9, 35.1, 33.1, 29.9. IR (ATR) 2948, 1726, 1432, 1314, 1197, 761, 698  $\text{cm}^{-1}$ . HRMS (ESI)  $m/z$ :  $[\text{M} + \text{H}]^+$  Calcd for  $\text{C}_{28}\text{H}_{26}\text{O}_4$  427.1904; Found 427.1906.

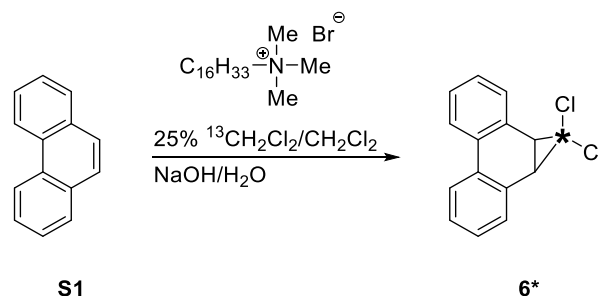

**$^{13}\text{C}$ -Labelled dichlorocyclopropyl phenanthrene **6\***:** To a pear-shaped round-bottom flask was added chloroform- $^{13}\text{C}$  (7.50 mL, 83.8 mmol), chloroform (22.5 mL, 251 mmol), and phenanthrene (**S1**, 26.0 g, 146 mmol). The flask was cooled to 0 °C in an ice bath, and hexadecyltrimethyl ammonium chloride (0.467 g, 1.46 mmol) was added. Aqueous sodium hydroxide (55 mL, 50% *w/v*) was then added via addition funnel over 15 min. The addition funnel was replaced with a dry condenser, and the reaction mixture was heated at 50 °C in a heating mantle for 24 h. Water (350 mL) was then added to the reaction mixture, and the insoluble material was removed by filtration then purified by flash column chromatography (hexanes). The organic layer was separated from the filtrate and the solvent was removed *in vacuo*. The resulting solid was purified by recrystallization from hexanes. Purification yielded  $^{13}\text{C}$ -labelled dichlorocyclopropyl phenanthrene (**6\***) as a white, flakey solid (5.88 g, 15%).  $^1\text{H}$  NMR (500 MHz,  $\text{CDCl}_3$ )  $\delta$  8.01 (d,  $J$  = 7.8 Hz, 2H), 7.48 (d,  $J$  = 7.4 Hz, 2H), 7.43–7.37 (m, 2H), 7.37–7.31 (m, 2H), 3.41 (s, 1H).  $^{13}\text{C}$

NMR (500 MHz, CDCl<sub>3</sub>) δ 131.4, 131.1, 128.3, 128.2, 128.1, 123.2, 59.0 (C\*), 36.6. HRMS (ESI) *m/z*: [M + H]<sup>+</sup> Calcd for C<sub>15</sub>H<sub>10</sub>Cl<sub>2</sub> 260.0160; Found 260.0172.

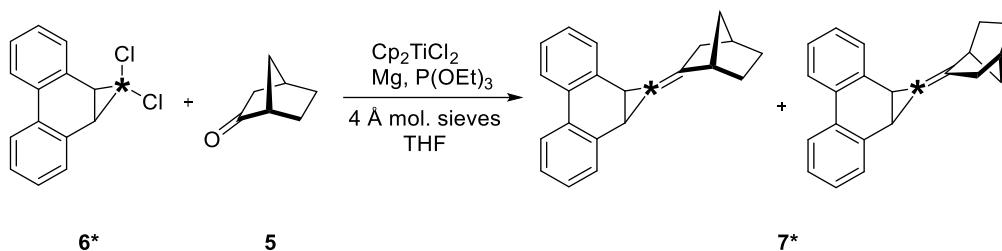

**Precursor 7\*:** According to the procedure of Takeda *et al.*,<sup>37</sup> to a round-bottom flask charged with magnesium turnings (0.182 g, 7.50 mmol) and 4 Å molecular sieves (0.375 g) was added bis(cyclopentadienyl)titanium(IV) dichloride (1.87 g, 7.50 mmol) followed by anhydrous THF (14 mL). Triethyl phosphite (2.57 mL, 15.0 mmol) was added and the reaction mixture was stirred for 3 h, during which the color of the mixture turned from red to dark green. A solution of <sup>13</sup>C-labelled dichlorocyclopropyl phenanthrene (6\*) dissolved in THF (5 mL) was added and the reaction mixture was stirred for an additional 30 min. Norcamphor (5, 0.138 g, 1.25 mmol) in THF (5 mL) was then added, and the reaction mixture was stirred for an additional 16 h. Hexanes (50 mL) was added, and the resulting suspension was transferred to a plug of silica and eluted with hexanes (50 mL) followed by a solution of hexanes and ethyl acetate (10:90, 20 mL). The elution was concentrated *in vacuo*, and purification of the resulting residue by flash chromatography (0:100→10:90 ethyl acetate:hexanes), followed by recrystallization from hexanes, afforded precursor 7\* as a mixture of diastereomers in 1.0:1.0 ratio as a white solid (0.027 g, 8%): Spectroscopic data are in agreement with those reported for precursor 7

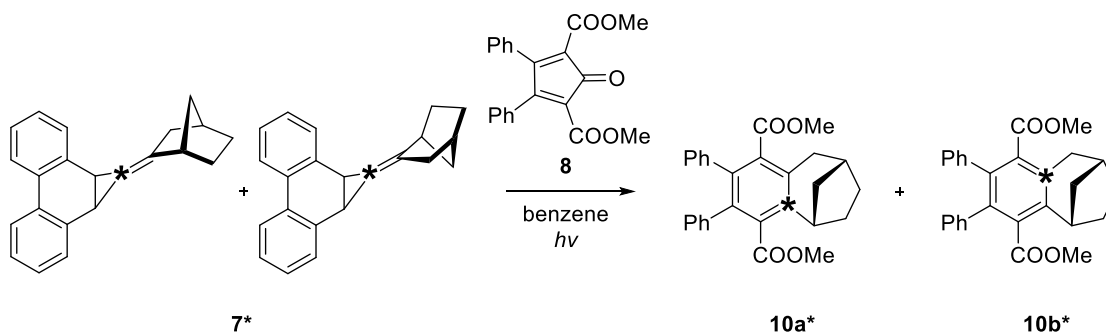

**Photolysis of 7\*:** Following the procedure for the photolysis of 7, Precursor 7\* (0.027 g, 0.095 mmol) and 2-oxo-4,5-diphenyl-cyclopenta-3,5-diene-1,3-dicarboxylic acid dimethylester (8, 0.035 g, 0.10 mmol) in benzene (1.2 mL) were irradiated for 22 h. Purification of the resulting residue by flash chromatography (2:98→10:90 ethyl acetate:hexanes) afforded adduct 10\* as a white solid as a mixture of isotopomers 10a\* and 10b\* (0.002 g, 5%). Spectroscopic data are in agreement with those reported for compound 10.

## Computational Data.

Coordinates and energies for CCSD(T)/CPCM<sub>(benzene)</sub>/def2-TZVPP//M06-2X/  
CPCM<sub>(benzene)</sub>/def2-TZVP optimized structures (at 298 K)

### 2-Norbornylidene carbene (3)

Charge = 0, Multiplicity = 1

|   |                   |                   |                   |
|---|-------------------|-------------------|-------------------|
| C | 0.13413749453814  | 0.03794565643607  | -0.00310287457049 |
| C | 1.65851633644041  | 0.25163042879527  | -0.00990445150073 |
| C | 0.82877358431929  | 2.36008567053229  | -0.01242569458248 |
| C | -0.43468746532210 | 1.48519252232522  | -0.00165949355121 |
| H | -0.19494836579759 | -0.53902910106422 | -0.86727131972641 |
| H | -0.17283408496560 | -0.50077269668539 | 0.89314479586524  |
| H | -1.07934041235378 | 1.69538462905380  | -0.85250768814032 |
| H | -1.00121470582402 | 1.68288540817492  | 0.90954318905963  |
| C | 1.80696461237876  | 1.52524654469455  | 0.83309953606170  |
| H | 2.82004313625681  | 1.92666825165639  | 0.83998474636137  |
| H | 1.44653460586926  | 1.40783758150702  | 1.85654802374056  |
| C | 2.07087324357303  | 0.75133035880467  | -1.40405223813808 |
| H | 3.15449414134055  | 0.80895195392197  | -1.50947041300418 |
| H | 1.67286324691433  | 0.14171689161377  | -2.21431855238473 |
| H | 2.23121866782614  | -0.61199663839336 | 0.32128199771033  |
| H | 0.67774723031572  | 3.39545920736295  | 0.27663334537364  |
| C | 1.48838480916582  | 2.15761492608658  | -1.40975917801630 |
| C | 1.42578040532482  | 3.20331063517747  | -2.15101252055754 |

G-E(el) = 0.12721547 Hartree

Final single point energy E(CCSD(T)) = -310.155403410154 Hartree

### Bicyclo[3.2.1]oct-2-yne (4)

Charge = 0, Multiplicity = 1

|   |                   |                   |                   |
|---|-------------------|-------------------|-------------------|
| C | 0.02139900153541  | 0.32061911735949  | -0.40006903290744 |
| C | 1.57270890865824  | 0.34088081916771  | -0.47899717784964 |
| C | 0.87665500856087  | 2.38176494434764  | 0.60800771504362  |
| C | -0.40691937626371 | 1.54454867756673  | 0.45698949469599  |
| H | -0.41525743042699 | 0.36319399321632  | -1.39792760675913 |
| H | -0.32336614769237 | -0.60410051337133 | 0.06175349763927  |
| H | -1.21624601474327 | 2.11039057596204  | -0.00097774717048 |
| H | -0.73663562055414 | 1.22622472709581  | 1.44788608806614  |
| C | 1.94095374625342  | 1.25378536356891  | 0.70674471325127  |
| H | 2.96534728791365  | 1.62409419158969  | 0.67103663752442  |



|   |                  |                   |                   |
|---|------------------|-------------------|-------------------|
| H | 1.79167777283049 | 0.71126713275355  | 1.64432528539960  |
| C | 2.06002287613748 | 0.93181330027405  | -1.84695253619123 |
| H | 3.14366811645408 | 0.87002772559713  | -1.95733803083472 |
| H | 1.59878309274473 | 0.39780337879916  | -2.67791740719970 |
| H | 1.99824846070236 | -0.65727557829583 | -0.36680332181005 |
| H | 0.86288568246086 | 3.06950817145120  | 1.44957996845057  |
| C | 1.19938632451030 | 2.96529886355357  | -0.73727379336744 |
| C | 1.59999479091858 | 2.32961733936416  | -1.68731552598102 |

G–E(el) = 0.12925857 Hartree

Final single point energy E(CCSD(T)) = -310.172033325805 Hartree

### Transition state TSa

Charge = 0, Multiplicity = 1

|   |                   |                   |                   |
|---|-------------------|-------------------|-------------------|
| C | -0.90407597751963 | -1.07146203356069 | 0.17186479058101  |
| C | 0.62802624154767  | -0.89113693466403 | 0.22063086747919  |
| C | -0.25811435489861 | 1.26775466769126  | 0.26036521010527  |
| C | -1.48751815836290 | 0.36890270018051  | 0.26309250170497  |
| H | -1.21416811988181 | -1.58450374690885 | -0.73856611971717 |
| H | -1.23885007985791 | -1.67300328422090 | 1.01628436658967  |
| H | -2.16801433731177 | 0.60815652283348  | -0.54986085479605 |
| H | -2.02424591589234 | 0.50469123059765  | 1.20448934847892  |
| C | 0.78592740123416  | 0.41931873452778  | 0.99287909336847  |
| H | 1.79250225128849  | 0.83426046308520  | 0.95527093764387  |
| H | 0.47778921240458  | 0.31718658618609  | 2.03642765139908  |
| C | 1.15808657755658  | -0.54420190026830 | -1.19191906891383 |
| H | 2.24844764077995  | -0.51003242763808 | -1.20903945317797 |
| H | 0.80998428732513  | -1.25500514886176 | -1.94153418605727 |
| H | 1.15084274894851  | -1.74965578103949 | 0.63721206908512  |
| H | -0.38957172177946 | 2.25456239875890  | 0.68550431184647  |
| C | 0.58786217815262  | 0.79047820355978  | -1.39929491125837 |
| C | 0.04509012626675  | 1.91368974974145  | -1.41380655436137 |

G–E(el) = 0.12746686 Hartree

Final single point energy E(CCSD(T)) = -310.143409653487 Hartree

### Transition state TSb

Charge = 0, Multiplicity = 1

|   |                   |                   |                  |
|---|-------------------|-------------------|------------------|
| C | -0.90482055533927 | -1.06237420329080 | 0.14532384200895 |
|---|-------------------|-------------------|------------------|

|   |                   |                   |                   |
|---|-------------------|-------------------|-------------------|
| C | 0.61796389508564  | -0.81263815727309 | 0.15352314992145  |
| C | -0.30579658328643 | 1.26071866742664  | 0.35300771403134  |
| C | -1.53497322799856 | 0.33657742136984  | 0.38307537360578  |
| H | -1.22925330678227 | -1.50554287026895 | -0.79609492484374 |
| H | -1.17610176968376 | -1.75066847004597 | 0.94508882405055  |
| H | -2.26696487114574 | 0.60836703593690  | -0.37446863328081 |
| H | -2.01245514987788 | 0.39568737628243  | 1.36155985325923  |
| C | 0.75547943982568  | 0.40106888923096  | 1.07549086454757  |
| H | 1.74839865903614  | 0.84854665088145  | 1.06045729402312  |
| H | 0.45768485216822  | 0.18730659238724  | 2.10294569630376  |
| C | 1.13068677480944  | -0.40028251018916 | -1.24397065151077 |
| H | 2.21480243342645  | -0.34014010796246 | -1.24997673427749 |
| H | 0.77571175464666  | -1.10664577272682 | -1.98774945000803 |
| H | 1.18633732855749  | -1.68827508946558 | 0.46823970790092  |
| H | -0.45732597688180 | 2.26389345378144  | 0.74464013010894  |
| C | 0.23250887582617  | 1.26099544178143  | -1.01221627411525 |
| C | 0.76811742761383  | 1.10340565214449  | -2.12887578172551 |

G-E(el) = 0.12758155 Hartree

Final single point energy E(CCSD(T)) = -310.142288532347 Hartree

## 2-Methylenebicyclo[2.2.1]heptane (11)

Charge = 0, Multiplicity = 1

|   |                   |                   |                   |
|---|-------------------|-------------------|-------------------|
| C | 2.18790816766552  | -0.89713890134570 | 0.08551253740696  |
| C | 1.91995057815873  | 1.34234531486113  | -0.05373840405044 |
| C | 0.47854885969045  | 0.80674293193669  | -0.07781156012964 |
| H | -0.08071134009307 | 1.12215122380556  | -0.96016321758979 |
| H | -0.07273340615939 | 1.13627882877751  | 0.80642516952705  |
| C | 2.59237779956136  | 0.34356238752505  | 0.90323991960387  |
| H | 3.67417730942152  | 0.47220828573331  | 0.96567139163506  |
| H | 2.16207603545082  | 0.35566104418005  | 1.90568001712343  |
| C | 2.79529904083752  | -0.55056163757260 | -1.29253148464726 |
| H | 3.85646836204450  | -0.80321655817257 | -1.30409222129201 |
| H | 2.30939343960476  | -1.09933910247013 | -2.09832898799311 |
| C | 2.58772240026562  | 0.98750752357843  | -1.39415728612223 |
| H | 3.54232360436764  | 1.50370026241272  | -1.49948109382714 |
| H | 1.96283552037609  | 1.26938063963170  | -2.24216311183191 |
| H | 2.48242404888303  | -1.87020091256644 | 0.47303726894521  |
| H | 1.99675945414421  | 2.39324206260046  | 0.21793176272846  |
| C | 0.69529897531098  | -0.70059782839111 | -0.03075023470216 |
| C | -0.23181570993613 | -1.64575257645151 | -0.07898819822386 |

H -1.28352597835435 -1.40198213260121 -0.17647539922939  
H 0.03189301876016 -2.69526426547135 -0.02009699733108

G-E(el) = 0.15208028 Hartree

Final single point energy E(M06-2X) = -312.016814072611 Hartree

### **Bicyclo[3.2.1]octane (S1)**

Charge = 0, Multiplicity = 1

C 0.04929920775039 0.23927960975764 -0.31136829476866  
C 1.58426296126582 0.30097803823386 -0.44513363973454  
C 0.96395057725987 2.34948547062035 0.56307318686534  
C -0.35801304951015 1.58455351168196 0.35083207848367  
H -0.43288133405875 0.08987697350365 -1.27918704393245  
H -0.23728080469277 -0.59856978092786 0.32519069430317  
H -1.05904043313409 2.15395639778629 -0.26219568795015  
H -0.84254940151806 1.40285420015434 1.31087410807479  
C 1.97161532664888 1.20662099884062 0.72926139941112  
H 3.00999737071334 1.54253281055954 0.68451869600429  
H 1.81561742033748 0.69097888083202 1.68063180568672  
C 2.00930830231960 0.97421849570864 -1.75597545531232  
H 3.09397211740391 1.12063998424896 -1.73976827855887  
H 1.78695513436112 0.32066689206091 -2.60351898588961  
H 2.03670195451300 -0.68945836619101 -0.37618817271641  
H 0.91990611677981 2.99861950522932 1.43891433664963  
C 1.34358373648716 3.17381241739872 -0.67347315932504  
H 2.34933332276156 3.58084268467167 -0.52868982089194  
H 0.66573906562616 4.02473163627988 -0.78027218662458  
C 1.30650891590353 2.32215012952406 -1.94644414608465  
H 1.75370803734084 2.86752765124427 -2.77970565879404  
H 0.26376340544136 2.14294329878217 -2.22362986489544

G-E(el) = 0.17781962 Hartree

Final single point energy E(CCSD(T)) = -312.711665651222 Hartree

### **Cycloheptyne (S2)**

Charge = 0, Multiplicity = 1

C -3.12995260584736 -1.58048481231175 -0.18677960487602  
C -1.64447248070347 -1.30937116315975 0.15965948059896  
C -1.16828208103952 0.15279012090176 -0.02592000118775

|   |                   |                   |                   |
|---|-------------------|-------------------|-------------------|
| C | -3.84080491261320 | -0.43328282540733 | 0.38650829546289  |
| C | -1.43603985100006 | 1.14383719868069  | 1.13376712566659  |
| C | -3.74630423232416 | 0.68082374467942  | 0.82952697396734  |
| C | -2.84390040720888 | 1.79025206570944  | 1.15361867974896  |
| H | -3.27428595957118 | -1.60577315593464 | -1.26929702045728 |
| H | -1.47750863216173 | -1.59846755899415 | 1.20057550960387  |
| H | -1.58289376998344 | 0.55692020961992  | -0.95564612530213 |
| H | -1.28806491174127 | 0.61709663640137  | 2.08015121747774  |
| H | -3.45376004053811 | -2.54303306019627 | 0.20876122872657  |
| H | -1.02482142444191 | -1.96552940090945 | -0.45608865204681 |
| H | -0.08620054171319 | 0.11622239291142  | -0.16526287479225 |
| H | -0.69309597689500 | 1.94397289934192  | 1.09563166098019  |
| H | -3.04563242675126 | 2.25584841553938  | 2.11819608824603  |
| H | -2.92086856546622 | 2.56884120312801  | 0.39131902818307  |

G-E(el) = 0.12238291 Hartree

Final single point energy E(CCSD(T)) = -272.167216565915 Hartree

### Cycloheptane (S3)

Charge = 0, Multiplicity = 1

|   |                   |                   |                   |
|---|-------------------|-------------------|-------------------|
| C | -2.86142061898079 | -0.81924141868910 | -0.01063586889843 |
| C | -1.33137313930543 | -0.78795979874426 | -0.03077333649573 |
| C | -0.69562550597206 | 0.59949974155011  | 0.01761426501508  |
| C | -3.45411864208615 | -0.42382686313086 | 1.34639286467094  |
| C | -1.16207055291091 | 1.50547956488638  | 1.15985939464558  |
| C | -3.68748813791019 | 1.07685299836108  | 1.55094083516196  |
| C | -2.60233857032739 | 1.99983662555531  | 0.98634099508293  |
| H | -3.26273414233773 | -0.17619524726443 | -0.80154199731321 |
| H | -0.97147038860381 | -1.37520282079303 | 0.82110458593272  |
| H | -0.89758265319309 | 1.11734522810623  | -0.92637042903152 |
| H | -1.05133274083635 | 0.98987013603777  | 2.12005205349389  |
| H | -2.78723999636448 | -0.79952680579766 | 2.12821018487348  |
| H | -3.79425016646654 | 1.26256876793839  | 2.62312514674998  |
| H | -3.18017934277173 | -1.83583118843547 | -0.25149366490501 |
| H | -0.97256544240001 | -1.29804766545898 | -0.92867203155233 |
| H | 0.38929443780683  | 0.47738183437714  | 0.07477630663115  |
| H | -4.40659642321828 | -0.93708079412986 | 1.49579814922859  |
| H | -0.49503630293235 | 2.36958573825805  | 1.19753564797529  |
| H | -4.64259024567760 | 1.35646214750870  | 1.09815756089994  |
| H | -2.71474951443644 | 2.97953421226350  | 1.45596215442486  |
| H | -2.77803262107549 | 2.15919258760101  | -0.08172981659017 |

G-E(el) = 0.16984089 Hartree

Final single point energy E(CCSD(T)) = -274.667800137001 Hartree

### Ethyl isopropyl alkylidene carbene (S4)

Charge = 0, Multiplicity = 1

|   |                 |                 |                 |
|---|-----------------|-----------------|-----------------|
| C | -2.806576000000 | 1.073331000000  | 0.109848000000  |
| C | -3.070915000000 | 1.952799000000  | 1.011302000000  |
| C | -3.304510000000 | 0.805506000000  | -1.284241000000 |
| C | -2.686873000000 | 1.753625000000  | -2.313067000000 |
| H | -4.389689000000 | 0.905081000000  | -1.297075000000 |
| H | -3.076774000000 | -0.229377000000 | -1.545369000000 |
| H | -3.048372000000 | 1.512335000000  | -3.313176000000 |
| H | -2.953416000000 | 2.785586000000  | -2.087314000000 |
| H | -1.599664000000 | 1.678933000000  | -2.314375000000 |
| C | -1.692481000000 | 0.205344000000  | 0.764151000000  |
| C | -0.453214000000 | 0.213889000000  | -0.125537000000 |
| C | -2.221018000000 | -1.204278000000 | 1.012256000000  |
| H | -1.424112000000 | 0.641874000000  | 1.731266000000  |
| H | -0.080460000000 | 1.227298000000  | -0.273058000000 |
| H | 0.334308000000  | -0.383845000000 | 0.336372000000  |
| H | -0.676272000000 | -0.220254000000 | -1.102605000000 |
| H | -3.083491000000 | -1.184754000000 | 1.677341000000  |
| H | -2.514105000000 | -1.684683000000 | 0.077089000000  |
| H | -1.440191000000 | -1.813533000000 | 1.470956000000  |

G-E(el) = 0.13680870Hartree

Final single point energy E(CCSD(T)) = -273.328885616656 Hartree

### 2-Methylhex-3-yne (S5)

Charge = 0, Multiplicity = 1

|   |                   |                  |                   |
|---|-------------------|------------------|-------------------|
| C | -3.17073833980051 | 0.90135958789331 | -0.83243830207210 |
| C | -2.35958235203191 | 0.52267586677856 | -0.02939899406564 |
| C | -4.13665719435910 | 1.36434165183327 | -1.82996434883408 |
| C | -3.48426576534199 | 1.65177382428309 | -3.18406958247495 |
| H | -4.62875600382882 | 2.26513972593613 | -1.45655597040679 |
| H | -4.91680515121228 | 0.60887959051653 | -1.94631976003310 |
| H | -4.23174581442031 | 1.99359134958890 | -3.89980520781377 |
| H | -2.72069901385833 | 2.42287743387199 | -3.08548818725839 |

|   |                   |                   |                   |
|---|-------------------|-------------------|-------------------|
| H | -3.01082233423767 | 0.75356919092912  | -3.57963808023277 |
| C | -1.36480095121485 | 0.05279367132190  | 0.94180307742402  |
| C | 0.04063092245921  | 0.07812781277033  | 0.33402293457583  |
| C | -1.71793796536745 | -1.34912848559610 | 1.44730628731477  |
| H | -1.38370250081877 | 0.74004963196937  | 1.79274234909166  |
| H | 0.30219147841209  | 1.07839597157339  | -0.00965348809231 |
| H | 0.77404308548428  | -0.23990713501531 | 1.07631434461899  |
| H | 0.09269107313029  | -0.60255604560659 | -0.51725289102240 |
| H | -2.71107897686085 | -1.36679383011381 | 1.89507454399745  |
| H | -1.70097217579158 | -2.06092948508976 | 0.62039184113352  |
| H | -0.99134202034142 | -1.67052332784433 | 2.19482242415007  |

G-E(el) = 0.13707935 Hartree

Final single point energy E(CCSD(T)) = -273.406138244404 Hartree

### Transition state TS-et-mig

Charge = 0, Multiplicity = 1

|   |              |              |              |
|---|--------------|--------------|--------------|
| 6 | -0.533673000 | 0.672802000  | 0.801381000  |
| 6 | -1.354321000 | 1.604855000  | 0.631649000  |
| 6 | -1.277040000 | 0.595389000  | -0.835776000 |
| 6 | -0.621784000 | 1.417560000  | -1.923968000 |
| 1 | -2.352938000 | 0.505753000  | -0.942850000 |
| 1 | -0.907334000 | -0.436279000 | -0.863661000 |
| 1 | -0.744723000 | 0.927049000  | -2.891943000 |
| 1 | -1.063855000 | 2.411260000  | -1.970558000 |
| 1 | 0.444912000  | 1.529835000  | -1.728805000 |
| 6 | 0.501996000  | -0.286390000 | 1.229288000  |
| 6 | 1.701833000  | -0.291215000 | 0.279760000  |
| 6 | -0.057767000 | -1.694999000 | 1.435572000  |
| 1 | 0.829967000  | 0.100125000  | 2.198830000  |
| 1 | 2.113446000  | 0.710319000  | 0.158718000  |
| 1 | 2.479720000  | -0.945510000 | 0.673779000  |
| 1 | 1.412962000  | -0.667424000 | -0.704046000 |
| 1 | -0.906412000 | -1.684547000 | 2.118028000  |
| 1 | -0.382270000 | -2.126986000 | 0.486785000  |
| 1 | 0.717281000  | -2.341598000 | 1.847818000  |

G-E(el) = 0.13631014 Hartree

Final single point energy E(CCSD(T)) = -273.316154494244 Hartree

### Transition state TS-ipr-mig

Charge = 0, Multiplicity = 1

|   |                 |                 |                 |
|---|-----------------|-----------------|-----------------|
| C | -0.894497000000 | 0.724515000000  | 0.375945000000  |
| C | -0.752086000000 | 1.070540000000  | 1.565198000000  |
| C | -1.198852000000 | 0.429647000000  | -1.025826000000 |
| C | -0.538502000000 | 1.384497000000  | -2.021479000000 |
| H | -2.285918000000 | 0.468714000000  | -1.127663000000 |
| H | -0.918457000000 | -0.607007000000 | -1.232476000000 |
| H | -0.824023000000 | 1.119531000000  | -3.039220000000 |
| H | -0.853791000000 | 2.408961000000  | -1.828446000000 |
| H | 0.546874000000  | 1.342435000000  | -1.944689000000 |
| C | 0.488226000000  | -0.238369000000 | 1.346417000000  |
| C | 1.568869000000  | -0.173896000000 | 0.276360000000  |
| C | -0.105697000000 | -1.615621000000 | 1.543265000000  |
| H | 0.942740000000  | 0.095734000000  | 2.272829000000  |
| H | 1.914196000000  | 0.848888000000  | 0.130103000000  |
| H | 2.415073000000  | -0.777467000000 | 0.611727000000  |
| H | 1.238469000000  | -0.576309000000 | -0.681930000000 |
| H | -0.818589000000 | -1.614945000000 | 2.366020000000  |
| H | -0.617450000000 | -1.964096000000 | 0.643969000000  |
| H | 0.693417000000  | -2.325751000000 | 1.769896000000  |

G-E(el) = 0.13642512 Hartree

Final single point energy E(CCSD(T)) = -273.310388501644 Hartree

### Nudged Elastic Band (NEB-TS) settings

|                                        |      |                                                           |
|----------------------------------------|------|-----------------------------------------------------------|
| Method type                            | .... | climbing image                                            |
| Threshold for climbing image           | .... | 2.00e-02 Eh/Bohr                                          |
| Free endpoints                         | .... | off                                                       |
| Tangent type                           | .... | improved                                                  |
| Number of intermediate images          | .... | 6                                                         |
| Number of images free to move          | .... | 6                                                         |
| Spring type for image distribution     | .... | distance between adjacent images                          |
| Spring constant                        | .... | energy weighted (0.0100 -to- 0.1000) Eh/Bohr <sup>2</sup> |
| Spring force perp. to the path         | .... | none                                                      |
| Generation of initial path             | .... | image dependent pair potential                            |
| Initial path via TS guess              | .... | off                                                       |
| Minimization of RMSD: Rotation         | .... | always                                                    |
| Minimization of RMSD: Translation type | .... | centroid                                                  |

Center fixed to origin           .... true  
Remove external force           .... true

Reparametrization of the path   .... off  
Convergence thresholds:  
Convergence monitored for       .... all images  
Scaling factor                   .... 10.00

Convergence parameters for regular images:  
    Max(|Fp|)                   .... 2.00e-02 Eh/Bohr  
    RMS(Fp)                   .... 1.00e-02 Eh/Bohr

Convergence parameters for climbing image:  
    Max(|F|)                   .... 2.00e-03 Eh/Bohr  
    RMS(F)                   .... 1.00e-03 Eh/Bohr

Optimization method:  
Method                         .... L-BFGS  
Max. iterations               .... 500  
Step size                      .... 1.00  
Maximum allowed step size     .... 0.10 Bohr

LBFGS parameters:  
    Memory                   .... 20  
    Initial step size         .... 0.0010  
    Estimate curvature       .... YES  
    Reset on maxmove        .... YES  
    Reparam. on reset        .... NO



# Experimental Spectra.

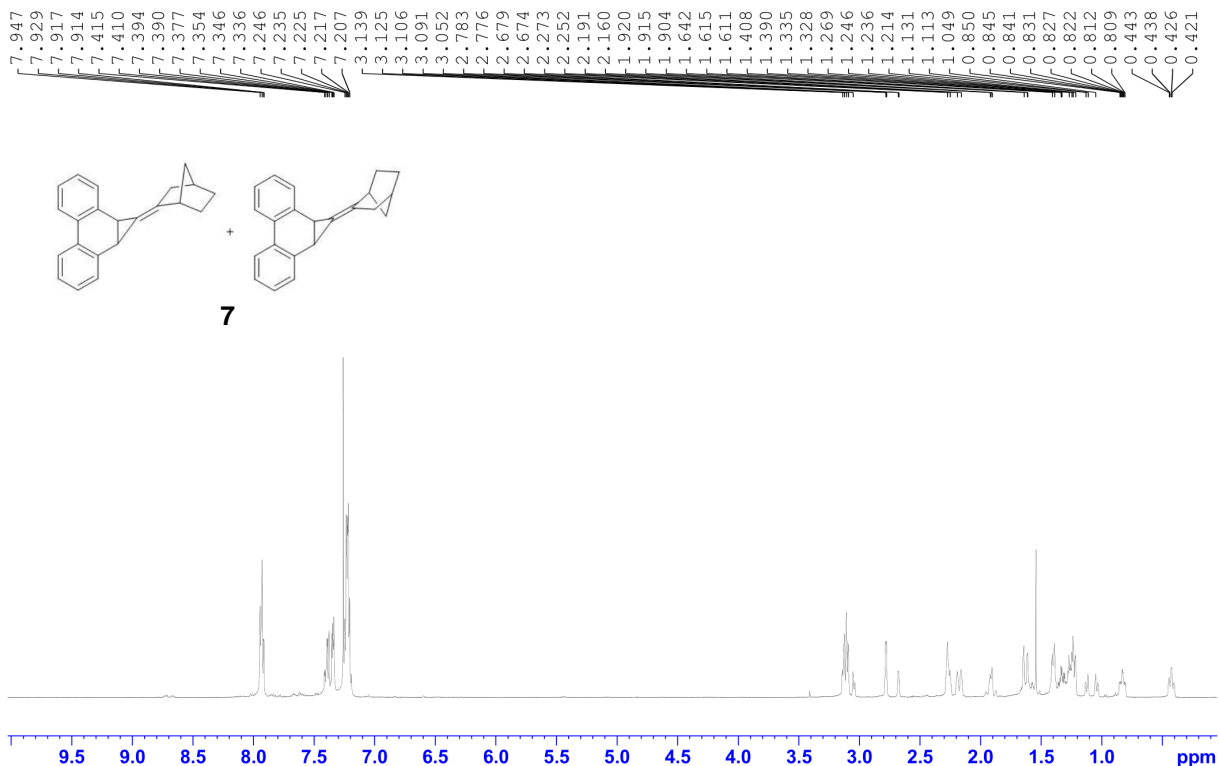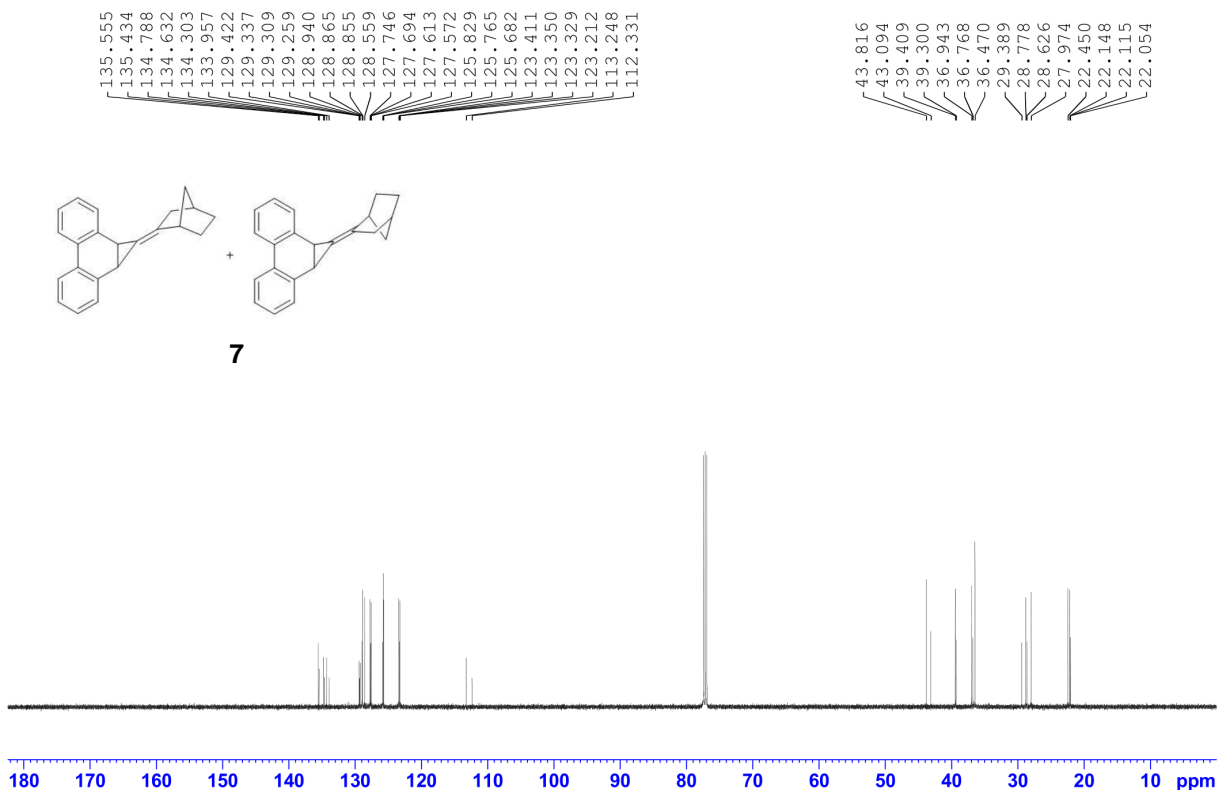

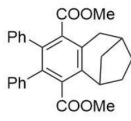

10

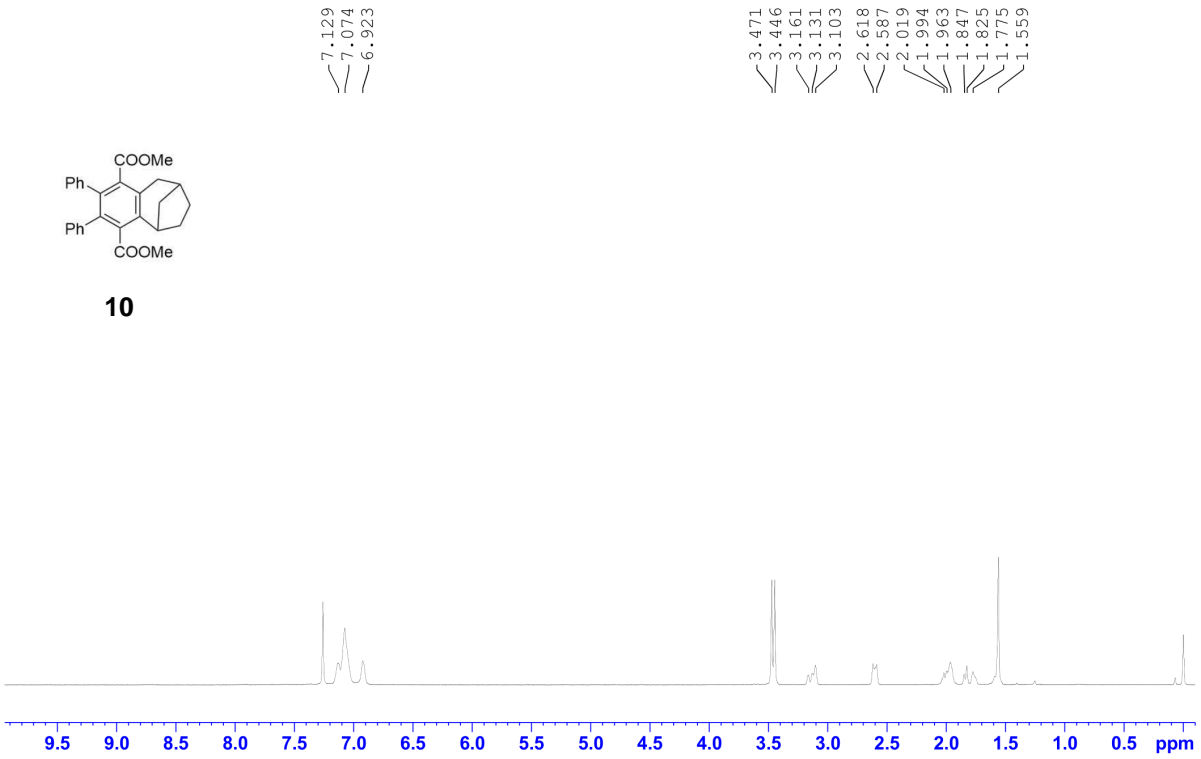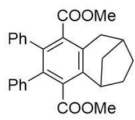

10

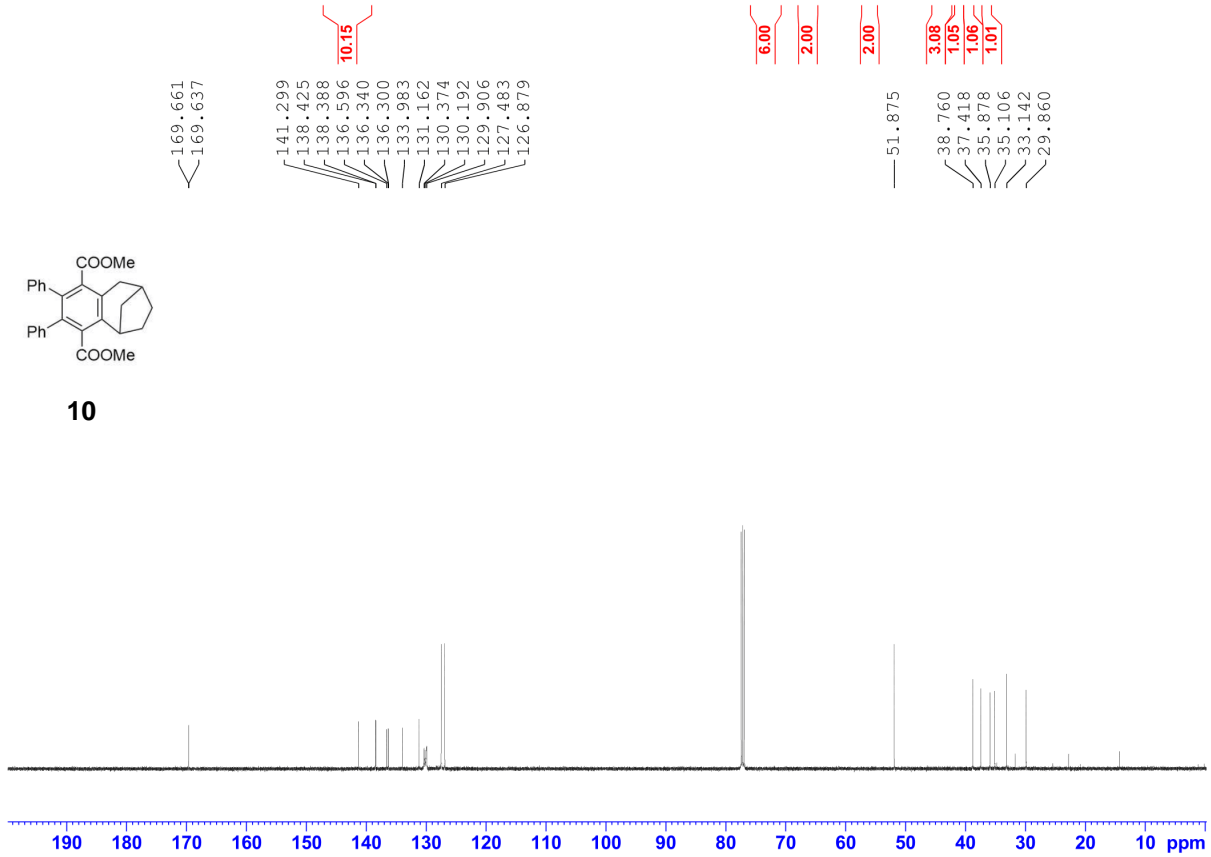

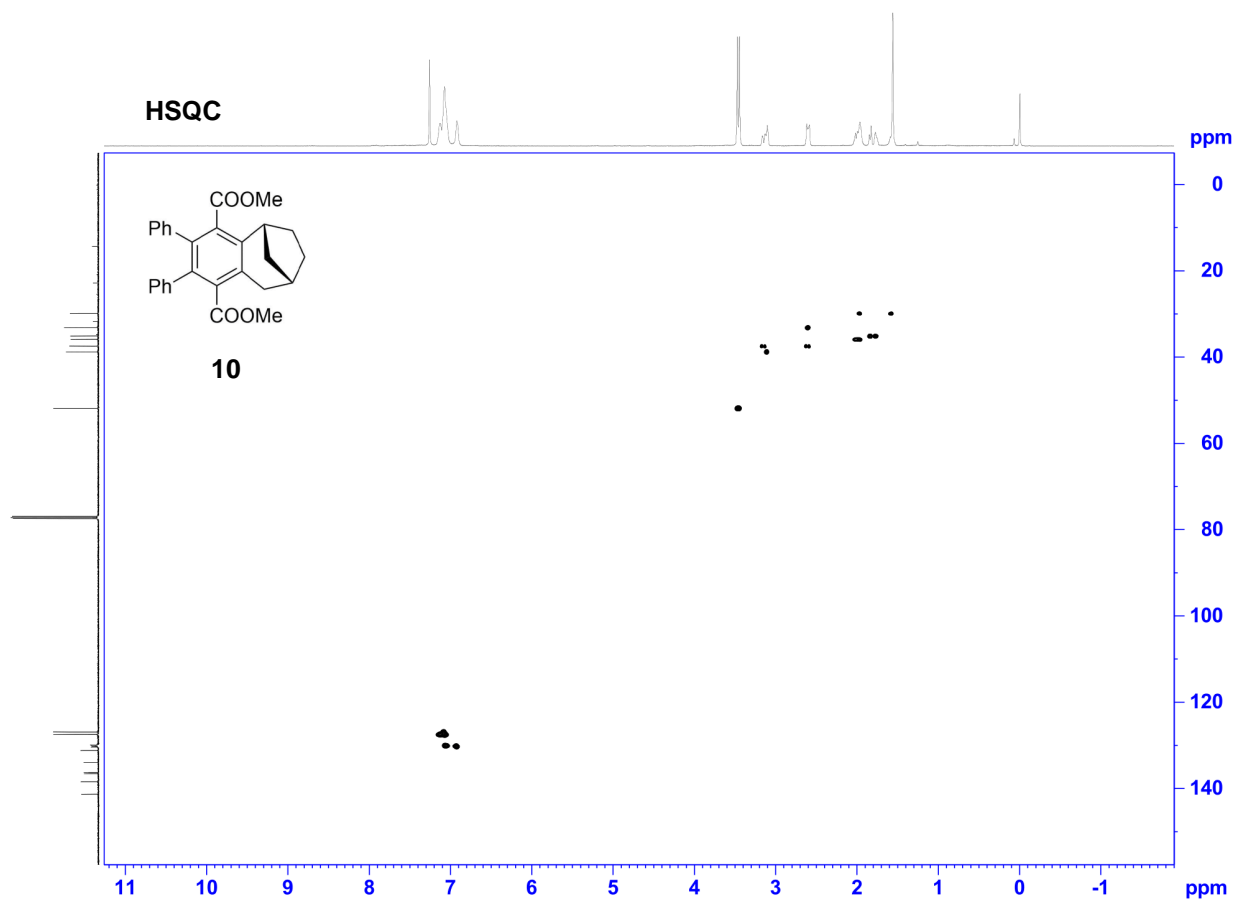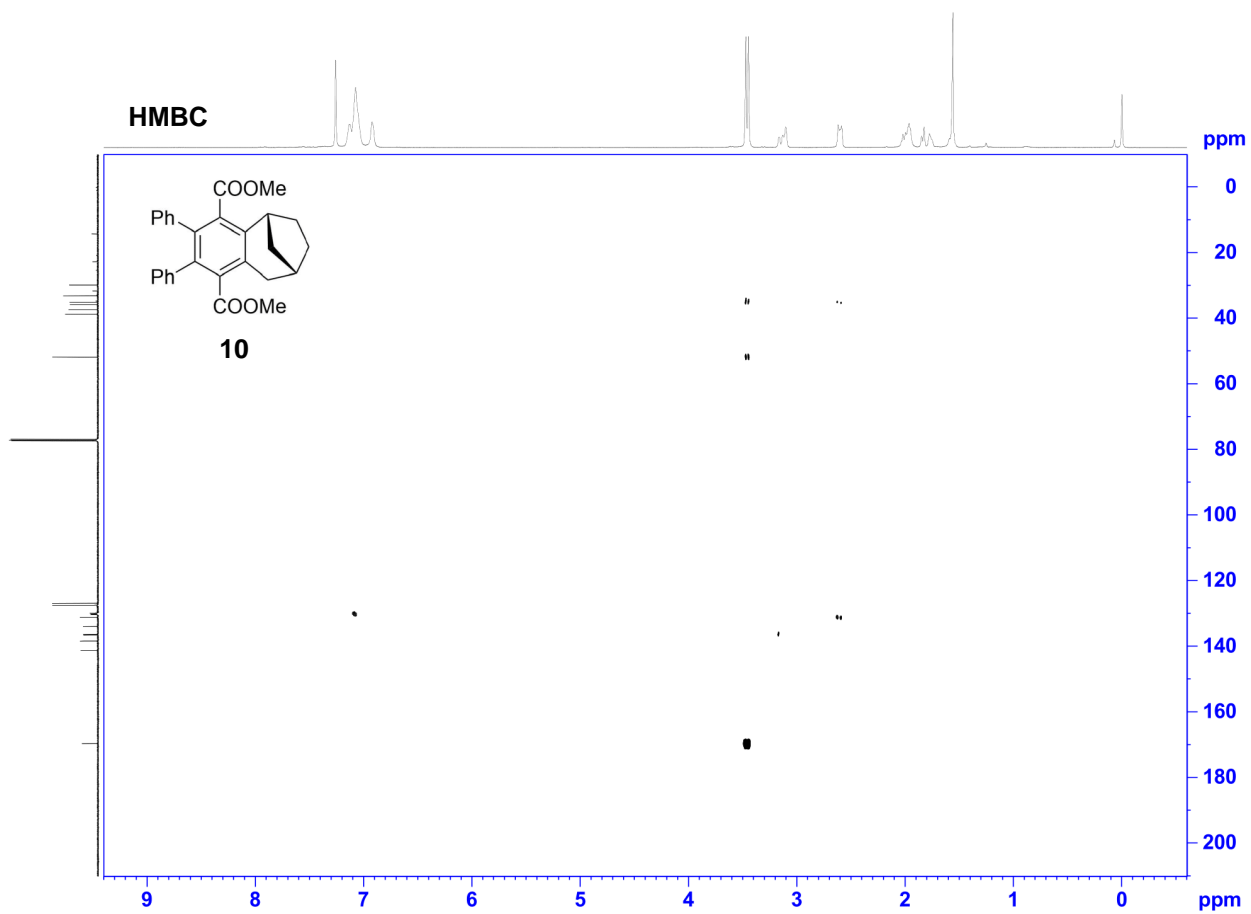

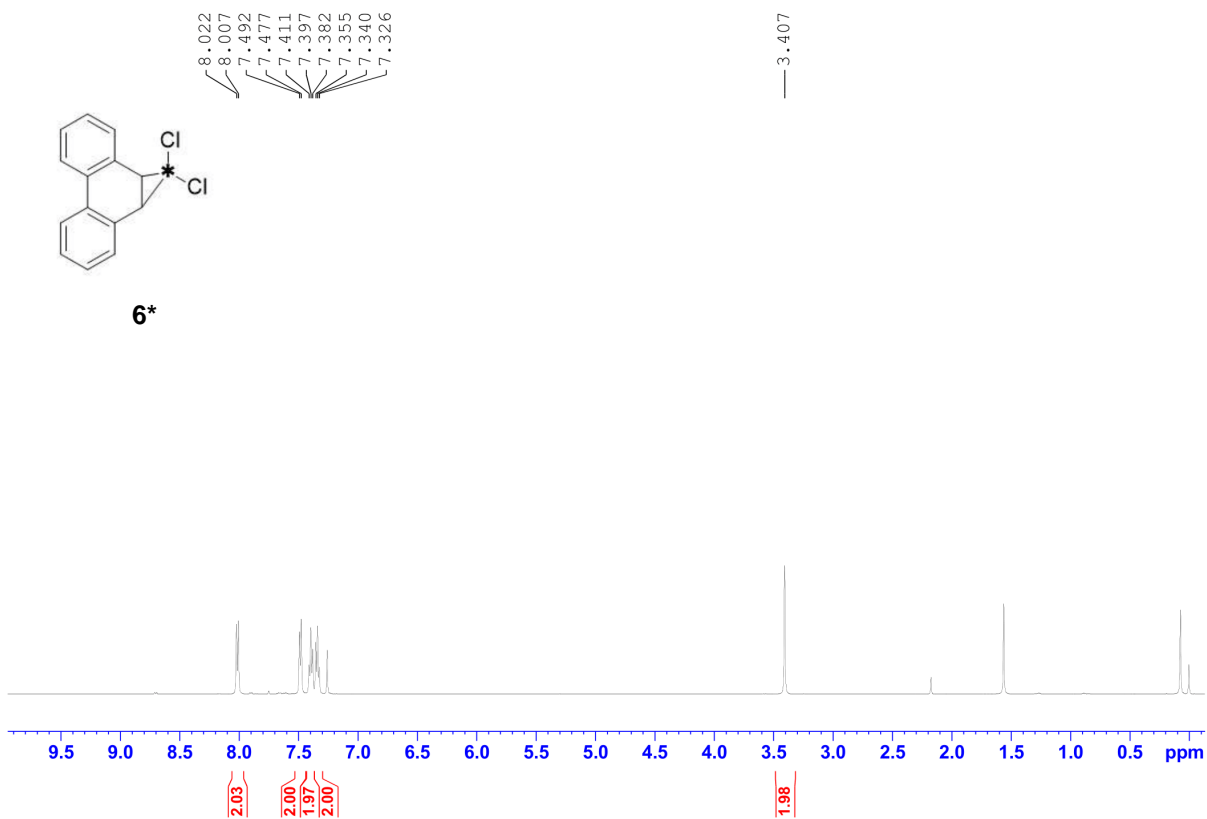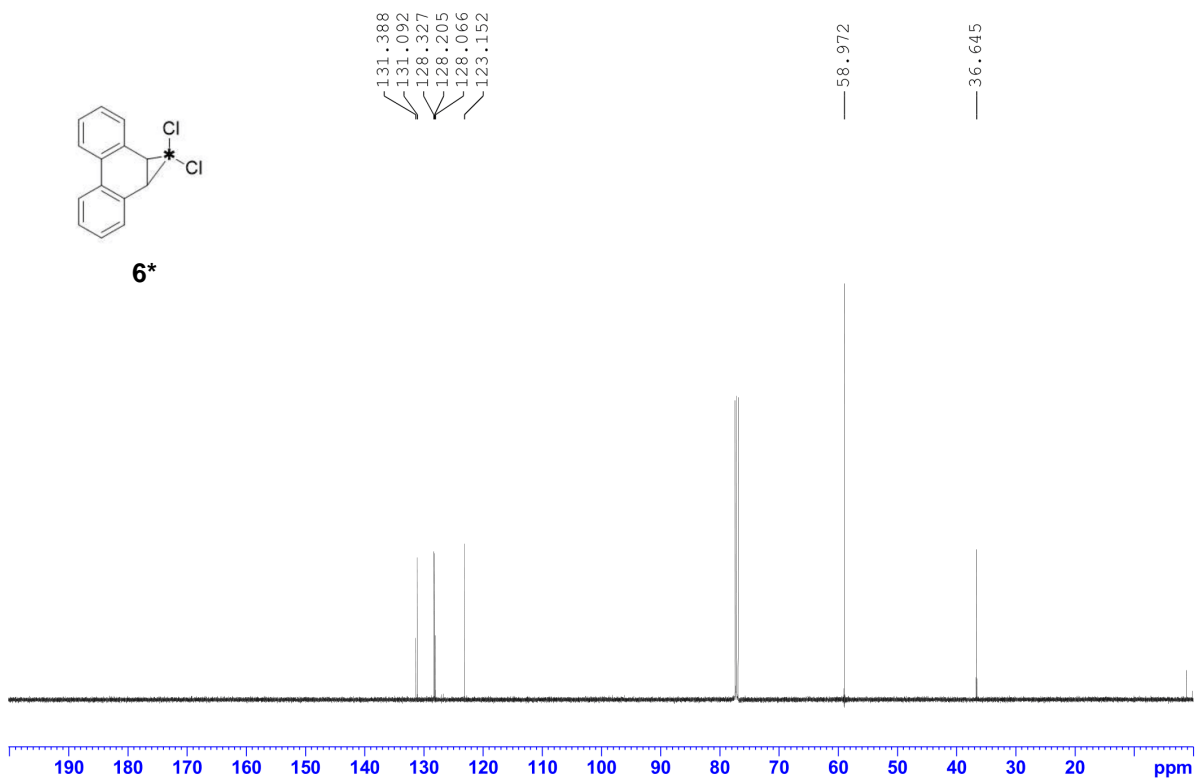

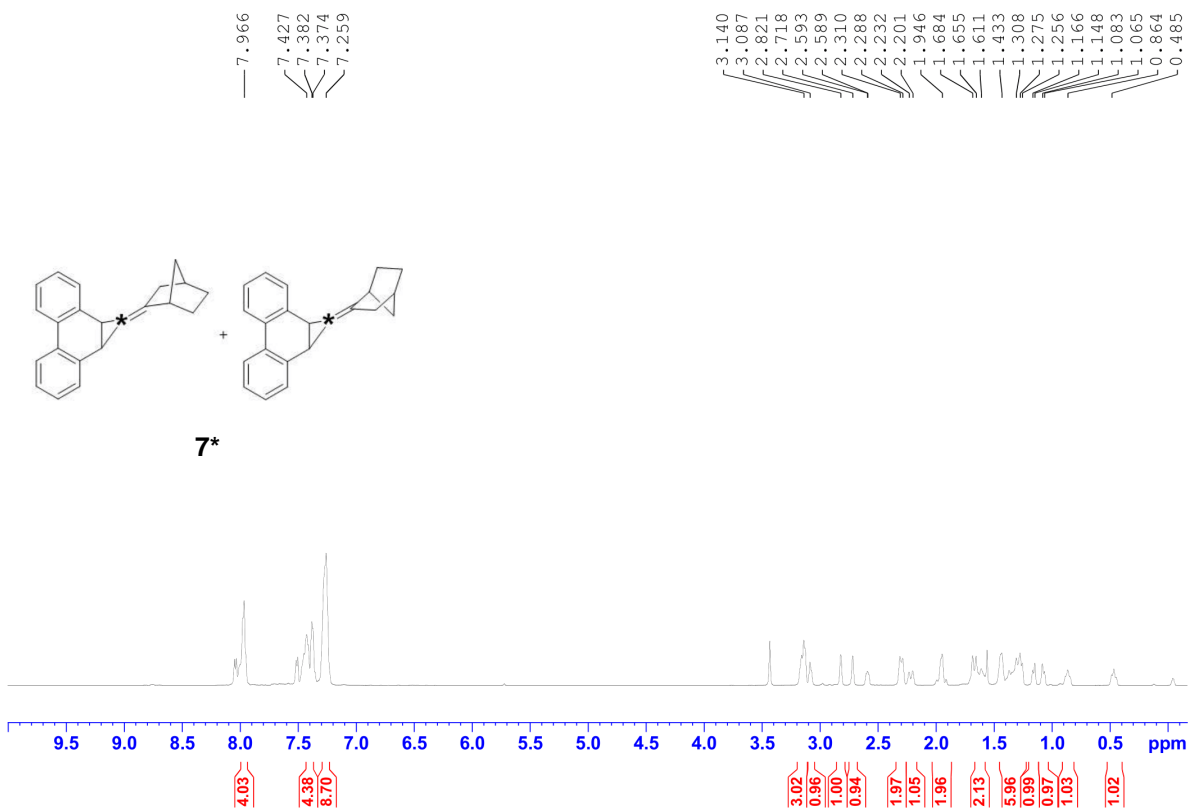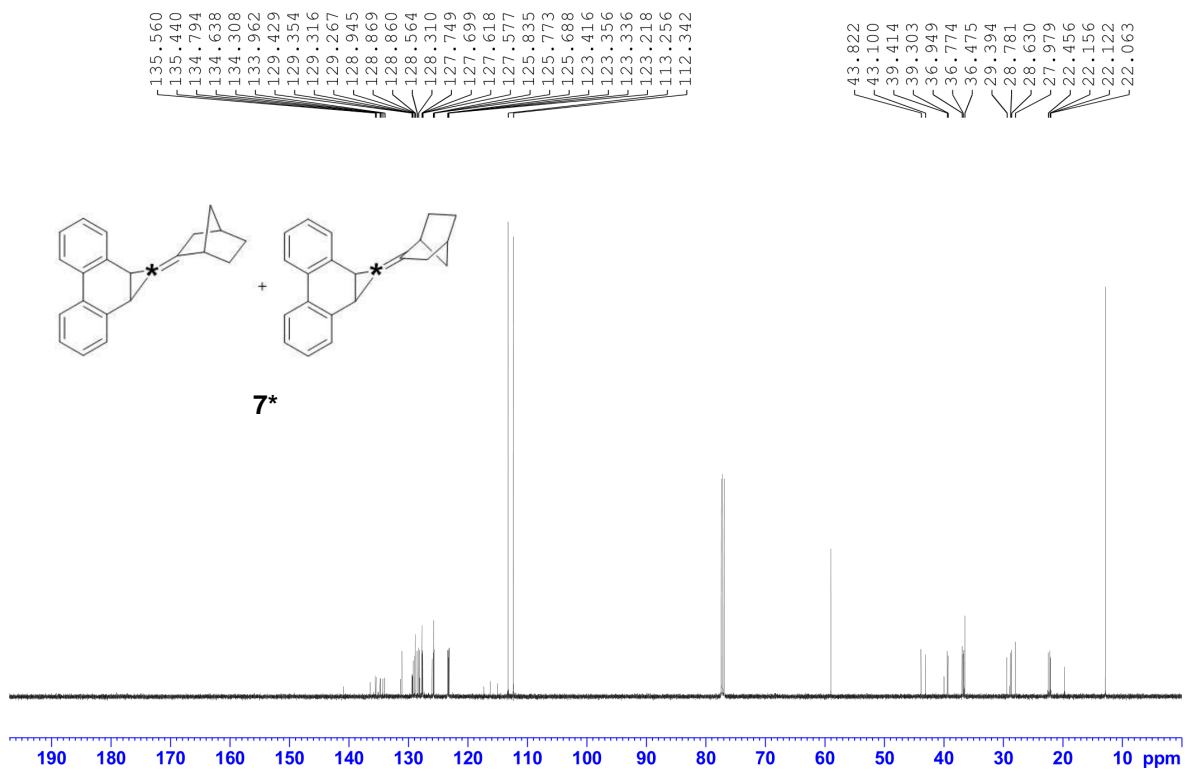

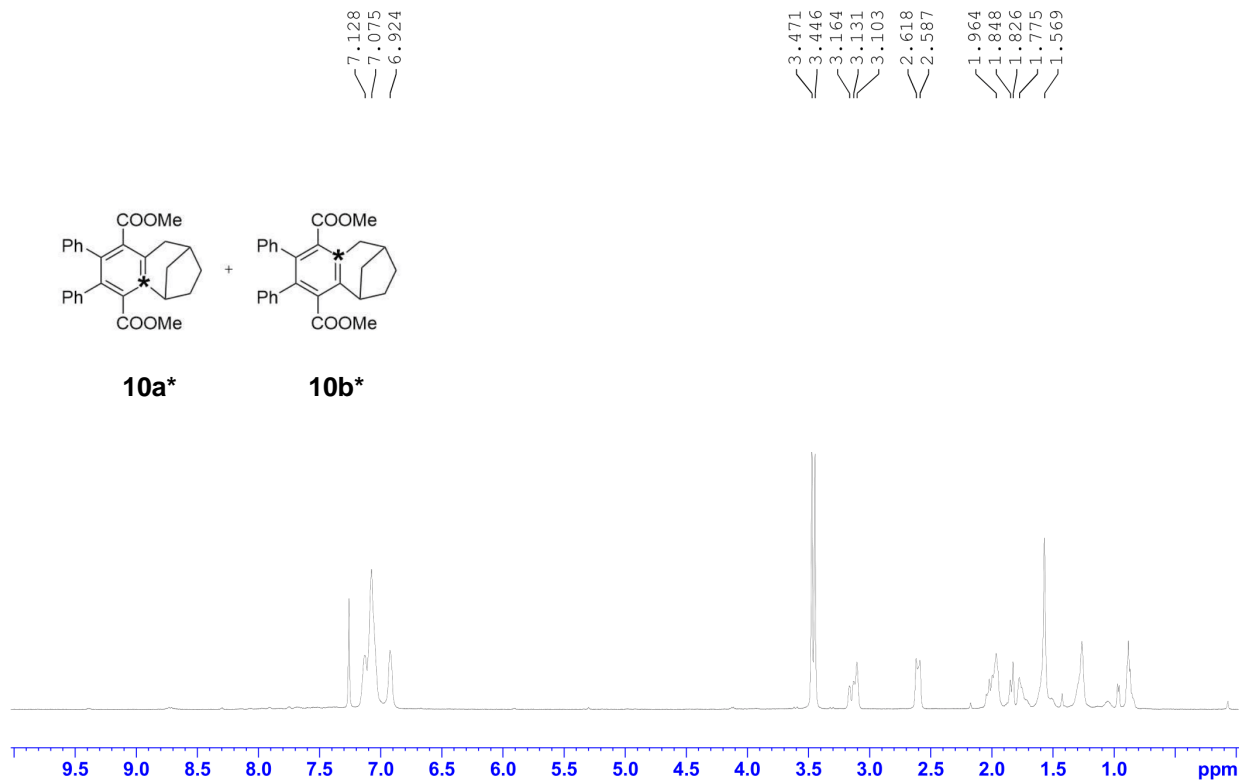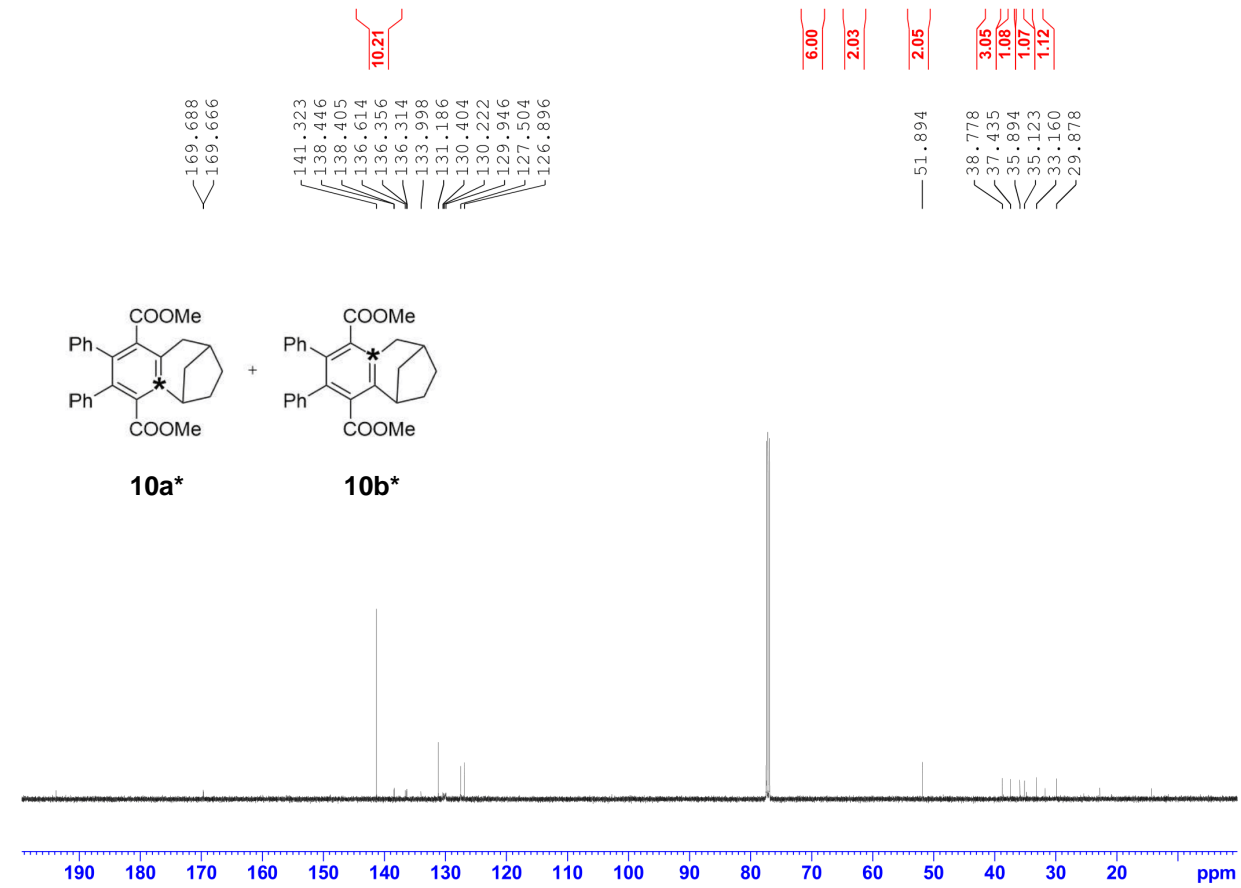

## References

1. Neese, F. The ORCA program system. *Wiley Interdiscip. Rev. Comput. Mol. Sci.* **2012**, *2* (1), 73-78.
2. Neese, F. Software update: the ORCA program system, version 4.0. *Wiley Interdiscip. Rev. Comput. Mol. Sci.* **2018**, *8*.
3. Neese, F. Software update: The ORCA program system—Version 5.0. *Wiley Interdiscip. Rev. Comput. Mol. Sci.* **2022**, *n/a* (n/a), e1606.
4. Zhao, Y.; Truhlar, D. G. The M06 suite of density functionals for main group thermochemistry, thermochemical kinetics, noncovalent interactions, excited states, and transition elements: two new functionals and systematic testing of four M06-class functionals and 12 other functionals. *Theor. Chem. Acc.* **2008**, *120*, 215-241.
5. Weigend, F.; Ahlrichs, R. Balanced basis sets of split valence, triple zeta valence and quadruple zeta valence quality for H to Rn: Design and assessment of accuracy. *Phys. Chem. Chem. Phys.* **2005**, *7* (18), 3297-3305.
6. Wennmohs, F.; Neese, F. A comparative study of single reference correlation methods of the coupled-pair type. *Chem. Phys.* **2008**, *343* (2), 217-230.
7. Neese, F.; Hansen, A.; Liakos, D. G. Efficient and accurate approximations to the local coupled cluster singles doubles method using a truncated pair natural orbital basis. *J. Chem. Phys.* **2009**, *131* (6), 064103.
8. Neese, F.; Wennmohs, F.; Hansen, A. Efficient and accurate local approximations to coupled-electron pair approaches: An attempt to revive the pair natural orbital method. *J. Chem. Phys.* **2009**, *130* (11), 114108.
9. Hansen, A.; Liakos, D. G.; Neese, F. Efficient and accurate local single reference correlation methods for high-spin open-shell molecules using pair natural orbitals. *J. Chem. Phys.* **2011**, *135* (21), 214102.
10. Riplinger, C.; Neese, F. An efficient and near linear scaling pair natural orbital based local coupled cluster method. *J. Chem. Phys.* **2013**, *138* (3), 034106.
11. Riplinger, C.; Sandhoefer, B.; Hansen, A.; Neese, F. Natural triple excitations in local coupled cluster calculations with pair natural orbitals. *J. Chem. Phys.* **2013**, *139* (13), 134101.
12. Pinski, P.; Riplinger, C.; Valeev, E. F.; Neese, F. Sparse maps—A systematic infrastructure for reduced-scaling electronic structure methods. I. An efficient and simple linear scaling local MP2 method that uses an intermediate basis of pair natural orbitals. *J. Chem. Phys.* **2015**, *143* (3), 034108.
13. Guo, Y.; Sivalingam, K.; Valeev, E. F.; Neese, F. SparseMaps—A systematic infrastructure for reduced-scaling electronic structure methods. III. Linear-scaling multireference domain-based pair natural orbital N-electron valence perturbation theory. *J. Chem. Phys.* **2016**, *144* (9), 094111.
14. Pavošević, F.; Peng, C.; Pinski, P.; Riplinger, C.; Neese, F.; Valeev, E. F. SparseMaps-A systematic infrastructure for reduced scaling electronic structure methods. V. Linear scaling explicitly correlated coupled-cluster method with pair natural orbitals. *J. Chem. Phys.* **2017**, *146* (17), 174108.

15. Riplinger, C.; Pinski, P.; Becker, U.; Valeev, E. F.; Neese, F. Sparse maps—A systematic infrastructure for reduced-scaling electronic structure methods. II. Linear scaling domain based pair natural orbital coupled cluster theory. *J. Chem. Phys.* **2016**, *144* (2), 024109.
16. Weigend, F. Accurate Coulomb-fitting basis sets for H to Rn. *Phys. Chem. Chem. Phys.* **2006**, *8* (9), 1057-1065.
17. Chmela, J.; Harding, M. E. Optimized auxiliary basis sets for density fitted post-Hartree–Fock calculations of lanthanide containing molecules. *Mol. Phys.* **2018**, *116* (12), 1523-1538.
18. Hellweg, A.; Hättig, C.; Höfener, S.; Klopper, W. Optimized accurate auxiliary basis sets for RI-MP2 and RI-CC2 calculations for the atoms Rb to Rn. *Theor. Chem. Acc.* **2007**, *117* (4), 587-597.
19. Perdew, J. P.; Burke, K.; Ernzerhof, M. Generalized Gradient Approximation Made Simple [Phys. Rev. Lett. 77, 3865 (1996)]. *Phys. Rev. Lett.* **1997**, *78* (7), 1396-1396.
20. Grimme, S.; Ehrlich, S.; Goerigk, L. Effect of the damping function in dispersion corrected density functional theory. *J. Comput. Chem.* **2011**, *32* (7), 1456-1465.
21. Grimme, S.; Antony, J.; Ehrlich, S.; Krieg, H. A consistent and accurate *ab initio* parametrization of density functional dispersion correction (DFT-D) for the 94 elements H–Pu. *J. Chem. Phys.* **2010**, *132* (15), 154104.
22. Neese, F. An improvement of the resolution of the identity approximation for the formation of the Coulomb matrix. *J. Comput. Chem.* **2003**, *24* (14), 1740-1747.
23. Neese, F.; Wennmohs, F.; Hansen, A.; Becker, U. Efficient, approximate and parallel Hartree-Fock and hybrid DFT calculations. A ‘chain-of-spheres’ algorithm for the Hartree-Fock exchange. *Chem. Phys.* **2009**, *356*, 98-109.
24. Izsák, R.; Neese, F. An overlap fitted chain of spheres exchange method. *J. Chem. Phys.* **2011**, *135* (14), 144105.
25. Izsák, R.; Hansen, A.; Neese, F. The resolution of identity and chain of spheres approximations for the LPNO-CCSD singles Fock term. *Mol. Phys.* **2012**, *110* (19-20), 2413-2417.
26. Barone, V.; Cossi, M. Quantum Calculation of Molecular Energies and Energy Gradients in Solution by a Conductor Solvent Model. *J. Phys. Chem. A* **1998**, *102* (11), 1995.
27. Lee, T. J.; Taylor, P. R. A diagnostic for determining the quality of single-reference electron correlation methods. *Int. J. Quantum Chem.* **1989**, *36* (S23), 199-207.
28. Ásgeirsson, V.; Birgisson, B. O.; Bjornsson, R.; Becker, U.; Neese, F.; Riplinger, C.; Jónsson, H. Nudged Elastic Band Method for Molecular Reactions Using Energy-Weighted Springs Combined with Eigenvector Following. *J. Chem. Theory Comput.* **2021**, *17* (8), 4929-4945.
29. Henkelman, G.; Uberuaga, B. P.; Jónsson, H. A climbing image nudged elastic band method for finding saddle points and minimum energy paths. *J. Chem. Phys.* **2000**, *113*, 9901-9904.
30. Henkelman, G. A.; Jónsson, H. Improved tangent estimate in the nudged elastic band method for finding minimum energy paths and saddle points. *J. Chem. Phys.* **2000**, *113*, 9978-9985.



31. Dennington, R.; Keith, T. A.; Millam, J. M. *GaussView*, Version 6; Semichem Inc.: Shawnee Mission, KS, 2016.
32. Zhurko, G. A. *Chemcraft - Graphical Program for Visualization of Quantum Chemistry Computations*, Ivanovo, Russia: <https://www.chemcraftprog.com>, 2005.
33. ORCA Tutorials. [https://www.orcasoftware.de/tutorials\\_orca/prop/thermo.html](https://www.orcasoftware.de/tutorials_orca/prop/thermo.html) (accessed October 2023).
34. NBO Version 3.1, E. D. Glendening, A. E. Reed, J. E. Carpenter, and F. Weinhold.
35. Gaussian 16, Revision C.01, M. J. Frisch, G. W. Trucks, H. B. Schlegel, G. E. Scuseria, M. A. Robb, J. R. Cheeseman, G. Scalmani, V. Barone, G. A. Petersson, H. Nakatsuji, X. Li, M. Caricato, A. V. Marenich, J. Bloino, B. G. Janesko, R. Gomperts, B. Mennucci, H. P. Hratchian, J. V. Ortiz, A. F. Izmaylov, J. L. Sonnenberg, D. Williams-Young, F. Ding, F. Lipparini, F. Egidi, J. Goings, B. Peng, A. Petrone, T. Henderson, D. Ranasinghe, V. G. Zakrzewski, J. Gao, N. Rega, G. Zheng, W. Liang, M. Hada, M. Ehara, K. Toyota, R. Fukuda, J. Hasegawa, M. Ishida, T. Nakajima, Y. Honda, O. Kitao, H. Nakai, T. Vreven, K. Throssell, J. A. Montgomery, Jr., J. E. Peralta, F. Ogliaro, M. J. Bearpark, J. J. Heyd, E. N. Brothers, K. N. Kudin, V. N. Staroverov, T. A. Keith, R. Kobayashi, J. Normand, K. Raghavachari, A. P. Rendell, J. C. Burant, S. S. Iyengar, J. Tomasi, M. Cossi, J. M. Millam, M. Klene, C. Adamo, R. Cammi, J. W. Ochterski, R. L. Martin, K. Morokuma, O. Farkas, J. B. Foresman, and D. J. Fox, Gaussian, Inc., Wallingford CT, 2016.
36. Bach, R. D. Ring Strain Energy in the Cyclooctyl System. The Effect of Strain Energy on [3 + 2] Cycloaddition Reactions with Azides. *J. Am. Chem. Soc.* **2009**, *131* (14), 5233.
37. Takeda, T.; Sasaki, R.; Fujiwara, T. Carbonyl Olefination by Means of a gem-Dichloride-Cp<sub>2</sub>Ti[P(OEt)<sub>3</sub>]<sub>2</sub> System. *J. Org. Chem.* **1998**, *63* (21), 7286-7288.
